# Supplementary material for: Predicting ambient aerosol thermal–optical reflectance measurements from infrared spectra: elemental carbon
Source: Copernicus journal article supplement (doi:10.5194/amt-8-4013-2015), 2015-10-02
Supplement: Supplementary file 2 [file amt-8-4013-2015-supplement.zip]

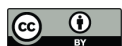

## *Supplement of*

# **Predicting ambient aerosol thermal–optical reflectance measurements from infrared spectra: elemental carbon**

**A. M. Dillner and S. Takahama**

*Correspondence to:* A. M. Dillner (amdillner@ucdavis.edu) and S. Takahama (satoshi.takahama@epfl.ch)

- amt-8-4013-2015-supplement-title-page.pdf
- Dillner Takahama FTIR TOR EC supplemental material\_revised1\_changes accepted.pdf
- supplemental\_data
  - Phoenix\_collocated\_samples.txt
  - TOR\_collocated\_samples.txt
  - full\_table.txt

The copyright of individual parts of the supplement might differ from the CC-BY 3.0 licence.
